# Supplementary material for: Development of Composite Indices to Measure the Adoption of Pro-Environmental Behaviours across Canadian Provinces
Source: PLoS One. 2014 Jul 11;9(7):e101569. doi: 10.1371/journal.pone.0101569 (PMC4094473; doi:10.1371/journal.pone.0101569)
Supplement: Table S3 — Results of the MCA for the Outdoor Index, 2007. Legend: N/A: Results are not available for supplementary variables. Qlt: Quality (i.e. the sum of the squared correlations for the first two dimensions in this case). Inr: Inertias. K: Principal coordinates for the first dimension. Cor: Squared correlation with the first dimension. Ctr: Contributions of the modality to the explained inertia of the first dimension. All cells are multiplied by 1000. Results are the same on rows and on column when a Burt table is used. (XLS) [file pone.0101569.s004.xls]

## Sheet: Table_S3
Question	Modality	Abbrev. Name	Mass	Qlt	Inr	K	Cor	Ctr
Pro-environmental behavior
FP_Q01 Applied chemical fertilizers to the lawn or the garden, in the last 12 months.	Valid skip	f1Vs	19	972	48	896	898	69
FP_Q04 Applied chemical pesticides to the lawn or the garden, in the last 12 months.	Valid skip	f4Vs	19	972	48	896	898	69
AQ_Q04 Burn yard waste on the property, in the last 12 months.	Valid skip	a4Vs	16	968	44	925	887	63
WA_Q17 Water the lawn last summer.	Valid skip	w17Vs	20	969	43	822	908	63
WA_Q24 Water the garden or areas with threes, shrubs, flowers or vegetables last summer.	Valid skip	w24Vs	27	949	32	611	891	46
WA_Q25 Number of time these areas were watered in an average week.	Valid skip	w25Vs	34	871	26	480	870	36
WA_Q26a Water those areas by hand using a watering can or a hose.	Valid skip	w26aVs	34	871	26	480	870	36
WA_Q26a Water those areas by hand using a watering can or a hose.	Yes	w26aY	23	759	26	-546	739	31
WA_Q18 Number of time the lawn was watered in an average week.	Once a week or less	w18L	12	796	29	-727	638	30
WA_Q19 Average duration of a watering session.	Less than 30 minutes	w19L	10	720	26	-711	567	24
WA_Q18 Number of time the lawn was watered in an average week.	Valid skip	w18Vs	42	966	19	350	763	24
WA_Q19 Average duration of a watering session.	Valid skip	w19Vs	42	966	19	350	763	24
WA_Q21a Water the lawn by hand using a watering can or a hose.	Valid skip	w21aVs	42	966	19	350	763	24
TD_Q01 Own or lease a motor vehicle for personal use, in the past 12 months	No	t1N	8	586	28	771	496	23
TD_Q02 Number of vehicle own or lease for personal use, in the last 12 months.	Valid skip	t2Vs	8	586	28	771	496	23
AQ_04 Burn yard waste on the property, in the last 12 months.	No	a4N	41	859	15	-320	830	20
FP_Q07a Applied pesticides as part of a regular maintenance schedule.	No	f7aN	9	501	20	-621	481	15
WA_Q21a Water the lawn by hand using a watering can or a hose.	Yes	w21aY	7	516	21	-677	413	14
WA_Q25 Number of time these areas were watered in an average week.	Once a week or less	w25L	11	501	19	-514	454	14
FP_Q04 Applied chemical pesticides to the lawn or the garden, in the last 12 months.	No	f4N	32	737	17	-285	434	12
FP_Q01 Applied chemical fertilizers to the lawn or the garden, in the last 12 months.	No	f1N	31	775	16	-277	419	11
FP_Q07a Applied pesticides as part of a regular maintenance schedule.	Valid skip	f7aVs	46	708	9	208	669	9
GP_Q03 Approximate fuel quantity used in operating recreational vehicles, in the last 12 months.	Less than 101 litres	g3L	6	296	17	-359	126	4
TD_Q06 Use regularly (1 to 3 times per week) public transport transit other that for travel to work, in the last 12 months.	Yes	t6Y	15	364	12	249	225	4
WA_Q17 Water the lawn last summer.	No	w17N	22	918	21	-82	21	1
GP_Q01f Does not own any of the following recreational vehicles, in the last 12 months: All-terrain vehicle, snowmobile, dirt bike or motocross motorcycle, personal watercraft, motorboat.	Yes	g1fY	52	390	4	75	193	1
GP_Q03 Approximate fuel quantity used in operating recreational vehicles, in the last 12 months.	Valid skip	g3Vs	52	390	4	75	193	1
TD_Q02 Number of vehicle own or lease for personal use, in the last 12 months.	1 or 2 vehicles	t2L	47	225	4	-74	169	1
WA_Q24 Water the garden or areas with threes, shrubs, flowers or vegetables last summer.	No	w24N	7	295	15	7	0	0
Anti-environmental behavior
WA_Q17 Water the lawn last summer.	Yes	w17Y	20	966	41	-742	763	51
WA_Q24 Water the garden or areas with threes, shrubs, flowers or vegetables last summer.	Yes	w24Y	28	871	32	-587	870	45
WA_Q21a Water the lawn by hand using a watering can or a hose.	No	w21aN	13	870	34	-776	684	37
WA_Q25 Number of time these areas were watered in an average week.	Twice or more a week	w25H	17	758	26	-638	750	31
WA_Q19 Average duration of a watering session.	30 minutes or more	w19H	9	767	27	-793	609	27
FP_Q01 Applied chemical fertilizers to the lawn or the garden, in the last 12 months.	Yes	f1Y	12	712	24	-660	622	24
FP_Q04 Applied chemical pesticides to the lawn or the garden, in the last 12 months.	Yes	f4Y	11	619	26	-679	547	23
WA_Q18 Number of time the lawn was watered in an average week.	Twice or more a week	w18H	7	688	24	-781	532	21
WA_Q26a Water those areas by hand using a watering can or a hose.	No	w26aN	5	515	19	-771	462	14
FP_Q07a Applied pesticides as part of a regular maintenance schedule.	Yes	f7aY	6	455	18	-668	412	12
GP_Q01f Does not own any of the following recreational vehicles, in the last 12 months: All-terrain vehicle, snowmobile, dirt bike or motocross motorcycle, personal watercraft, motorboat.	No	g1fN	10	403	21	-381	203	7
TD_Q02 Number of vehicle own or lease for personal use, in the last 12 months.	3 or more vehicles	t2H	7	306	14	-459	290	6
TD_Q01 Own or lease a motor vehicle for personal use, in the past 12 months.	Yes	t1Y	54	601	4	-121	511	4
AQ_Q04 Burn yard waste on the property, in the last 12 months.	Yes	a4Y	5	308	13	-346	122	3
GP_Q03 Approximate fuel quantity used in operating recreational vehicles, in the last 12 months.	101 litres or more	g3H	3	192	15	-442	116	3
TD_Q06 Use regularly (1 to 3 times per week) public transport transit other that for travel to work, in the last 12 months.	No	t6N	47	390	4	-86	247	2
Supplementary variables
Province	Alberta	pAl	N/A	708	N/A	-205	528	N/A
Province	British Columbia	pCB	N/A	303	N/A	2	0	N/A
Province	Prince Edouard Island	pIPE	N/A	859	N/A	51	19	N/A
Province	Manitoba	pMb	N/A	97	N/A	-54	90	N/A
Province	New Brunswick	pNB	N/A	878	N/A	6	0	N/A
Province	Nova Scotia	pNE	N/A	832	N/A	24	6	N/A
Province	Ontario	pOn	N/A	794	N/A	-76	457	N/A
Province	Quebec	pQc	N/A	887	N/A	220	709	N/A
Province	Saskatchewan	pSk	N/A	463	N/A	-193	364	N/A
Province	Newfoundland and Labrador	pTN	N/A	408	N/A	-69	55	N/A
